# Supplementary material for: Highly active and dual-function self-supported multiphase NiS–NiS2–Ni3S2/NF electrodes for overall water splitting
Source: Royal Society of Chemistry journal article supplement (doi:10.1039/c8ta03862g), 2018-01-01
Supplement: c8ta03862g1.pdf [file c8ta03862g1.pdf]

Electronic Supplementary Material (ESI) for Journal of Materials Chemistry A.

This journal is © The Royal Society of Chemistry 2018

## Highly Active and Dual-Functional Self-Supported Multiphase NiS-NiS<sub>2</sub>-

### Ni<sub>3</sub>S<sub>2</sub>/NF Electrode for Overall Water Splitting

Feng Jing,<sup>a,#</sup> Qiying Lv,<sup>a,#</sup> Jian Xiao,<sup>a,#</sup> Qijun Wang<sup>a</sup> and Shuai Wang<sup>a,b,\*</sup>

<sup>a</sup>. State Key Laboratory of Digital Manufacturing Equipment and Technology. Key laboratory of Material Chemistry for Energy Conversion and Storage, Ministry of Education. School of Chemistry and Chemical Engineering, Huazhong University of Science and Technology, Wuhan 430074, P. R. China

<sup>b</sup>. Flexible Electronics Research Center (FERC). School of Mechanical Science and Engineering, Huazhong University of Science and Technology, Wuhan 430074, P. R. China

#. These authors contributed equally to this study.

\*Corresponding author: chmsamuel@mail.hust.edu.cn (Shuai Wang)

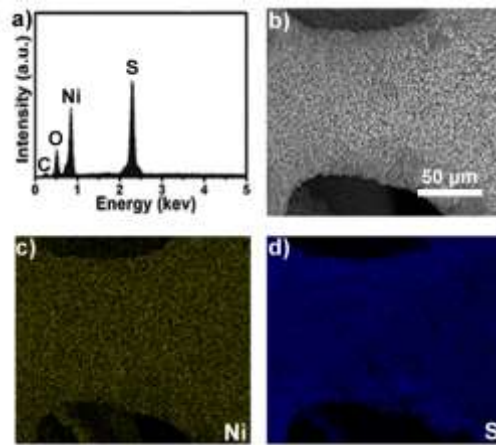

**Fig. S1** Morphology of the sample. **a**, EDS spectrum. **b**, SEM image of the m-NiS<sub>x</sub>-0.5/NF electrode. **c-d**, elemental mapping of the m-NiS<sub>x</sub>-0.5/NF electrode, respectively.

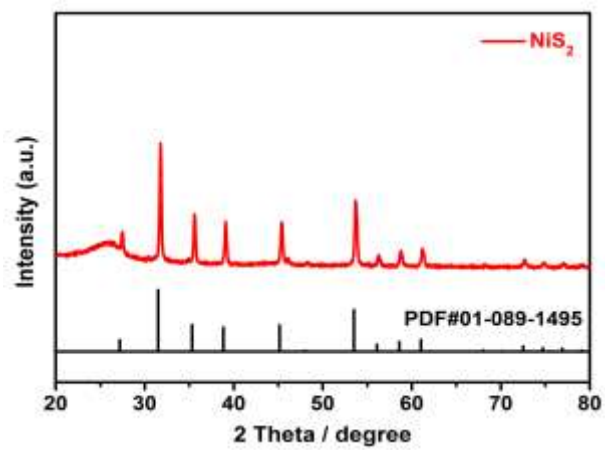

**Fig. S2** XRD diffraction pattern of the as-prepared NiS<sub>2</sub> supported on carbon cloth.

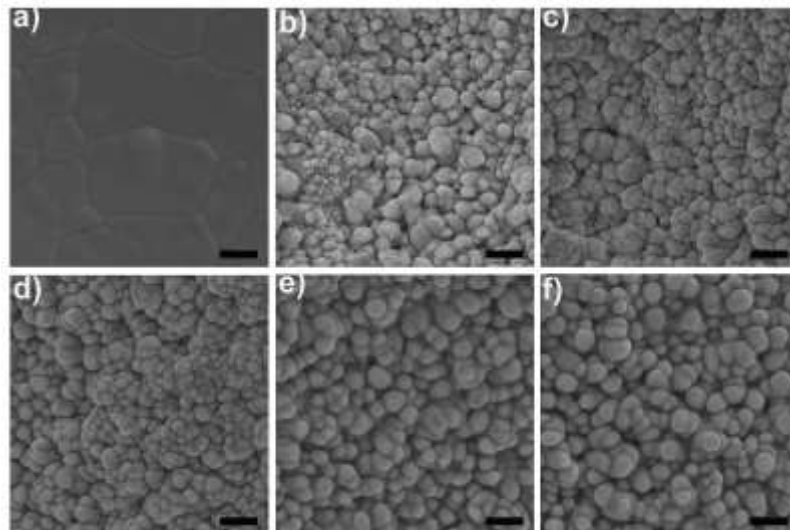

**Fig. S3** Morphologies of the samples. SEM images of (a) NF, (b) m-NiS<sub>x</sub>-0.1/NF, (c) m-NiS<sub>x</sub>-0.2/NF, (d) m-NiS<sub>x</sub>-0.5/NF, (e) m-NiS<sub>x</sub>-1.0/NF, and (f) m-NiS<sub>x</sub>-U/NF, respectively. Each scale bar is 5 μm.

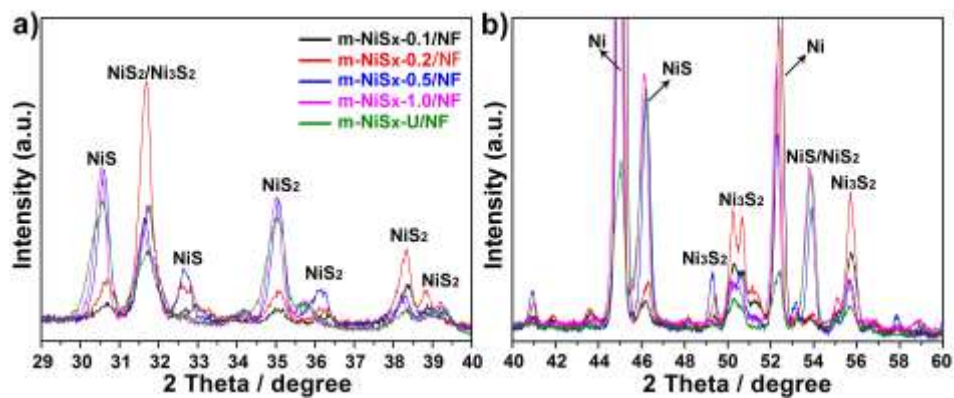

**Fig. S4** XRD diffraction pattern of the as-prepared m-NiS<sub>x</sub>/NF electrodes. The variation of grain sizes as the amount of sulfur powder increases.

**Table S1** The approximate grain sizes of each phase in different quantity of sulfur powder<sup>a, b</sup>

| Samples                    | $2\theta$ (degree) $\rightarrow$ D (nm) |       |       |               |               |       |       |       |       |
|----------------------------|-----------------------------------------|-------|-------|---------------|---------------|-------|-------|-------|-------|
|                            | 22.3°                                   | 27.8° | 30.7° | 35.1°         | 38.4°         | 46.2° | 50.2° | 53.8° | 55.7° |
| NiS                        |                                         |       | 21.1  |               |               | 35.6  |       | 22.0  |       |
| m-NiS <sub>x</sub> -0.1/NF | NiS <sub>2</sub>                        | 22.1  |       | 20.4          | 41.3          |       |       | 22.0  |       |
|                            | Ni <sub>3</sub> S <sub>2</sub>          | 40.1  |       |               |               |       | 22.5  |       | 61.2  |
| m-NiS <sub>x</sub> -0.2/NF | NiS                                     |       | 32.9  |               |               | 36.8  |       | 23.2  |       |
|                            | NiS <sub>2</sub>                        |       | 36.2  |               | 33.9          | 48.2  |       | 23.2  |       |
| m-NiS <sub>x</sub> -0.5/NF | NiS                                     |       | 47.0  |               |               | 79.0  |       | 51.8  |       |
|                            | NiS <sub>2</sub>                        |       | 23.4  |               | 65.3          | 36.1  |       | 51.8  |       |
| m-NiS <sub>x</sub> -1.0/NF | NiS                                     |       | 48.2  |               |               | 80.7  |       | 52.9  |       |
|                            | NiS <sub>2</sub>                        |       | 23.4  | 35.1°<br>63.5 | 35.7°<br>35.8 | 36.1  |       | 52.9  |       |
| m-NiS <sub>x</sub> -U/NF   | NiS                                     |       | 47.8  |               |               | 80.4  |       | 53.4  |       |
|                            | NiS <sub>2</sub>                        |       | 23.4  | 35.2°<br>49.7 | 35.9°<br>34.7 | 31.3  |       | 53.4  |       |
|                            | Ni <sub>3</sub> S <sub>2</sub>          | 34.8  |       |               |               |       | 30.9  |       | 29.5  |

<sup>a</sup> All the data are the raw data. <sup>b</sup> Calculated with Scherrer formula  $D = k\lambda/(\pi \times (\text{FWHM}/180) \times \cos\theta)$ , here,  $D$  is the grain size of particles (nm);  $k$  is the constant (0.89),  $\theta$  is the half of the diffraction angle, and  $\lambda$  is the wavelength of Cu K $\alpha$  radiation (1.5406 Å).

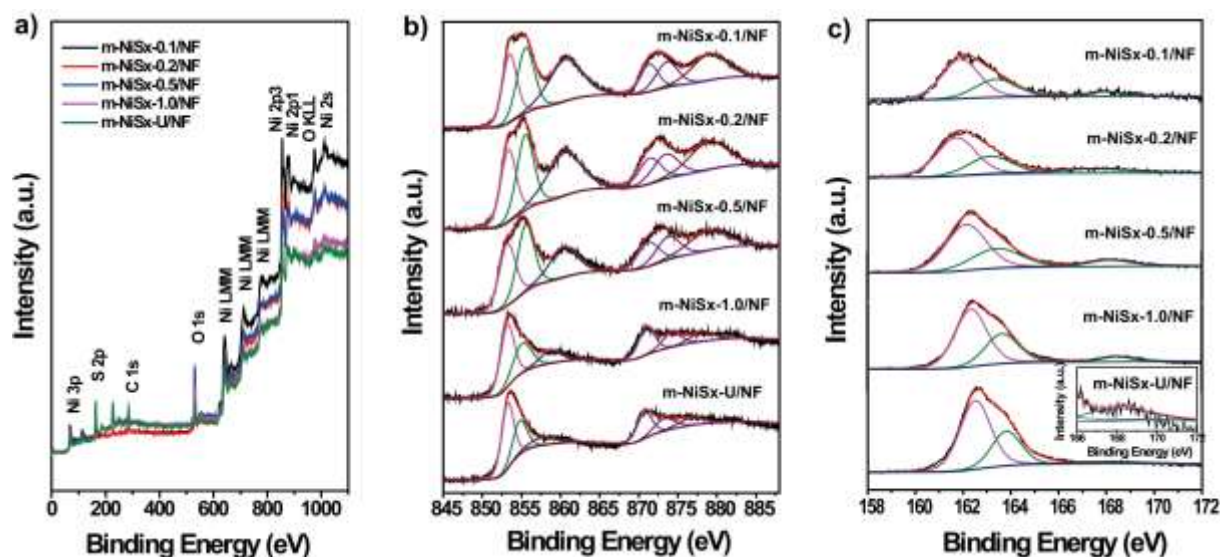**Fig. S5** XPS full spectra (a), the high-resolution spectra of Ni 2p (b), and S 2p (c) for the m-NiS<sub>x</sub>-0.1/NF, m-NiS<sub>x</sub>-0.2/NF, m-NiS<sub>x</sub>-0.5/NF, m-NiS<sub>x</sub>-1.0/NF, and m-NiS<sub>x</sub>-U/NF, respectively.

**Table S2** The area ratio summary of Ni 2P<sub>3/2</sub> in Ni 2P

| Samples                    | Area(855.5 eV) | Area(853.2 eV) | Area(855.5 eV)/Area(853.2 eV) |
|----------------------------|----------------|----------------|-------------------------------|
| m-NiS <sub>x</sub> -0.1/NF | 67134.970      | 59107.040      | 1.14                          |
| m-NiS <sub>x</sub> -0.2/NF | 51422.200      | 45412.700      | 1.13                          |
| m-NiS <sub>x</sub> -0.5/NF | 41177.070      | 38245.680      | 1.07                          |
| m-NiS <sub>x</sub> -1.0/NF | 20086.780      | 31799.010      | 0.63                          |
| m-NiS <sub>x</sub> -U/NF   | 19327.250      | 32582.770      | 0.59                          |

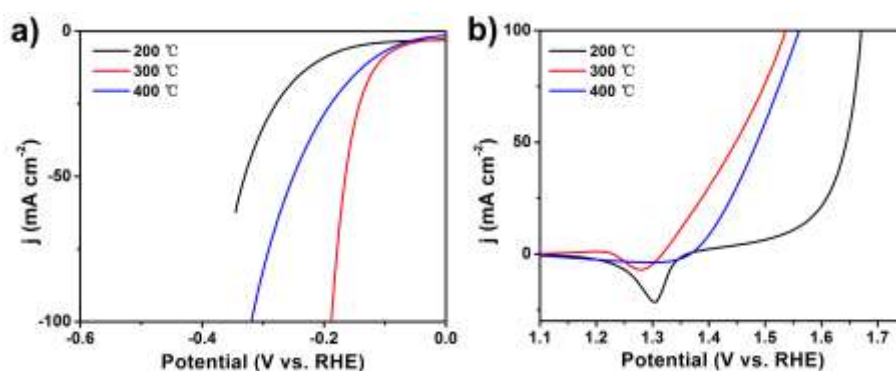

**Fig. S6** LSV curves of the catalysts sulfidization with 200 °C, 300 °C and 400 °C in 1.0 M KOH toward (a) HER and (b) OER.

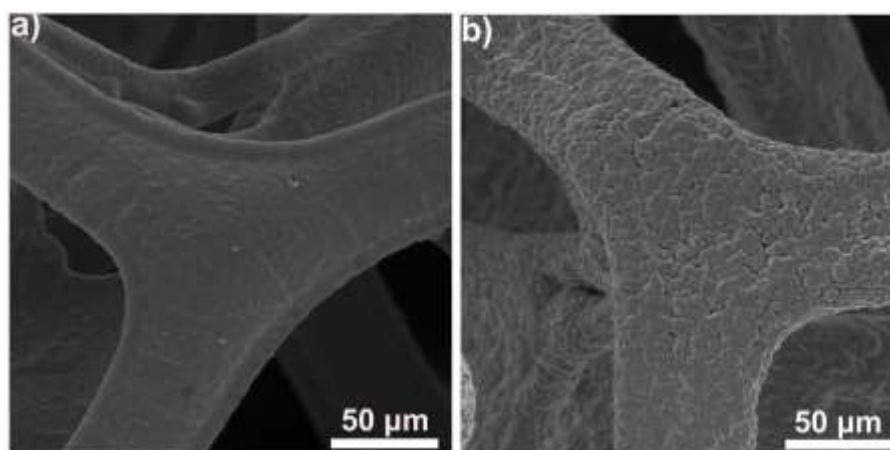

**Fig. S7** SEM images of (a) m-NiS<sub>x</sub>-0.5/NF prepared at 200 °C and (b) m-NiS<sub>x</sub>-0.5/NF prepared at 400 °C.

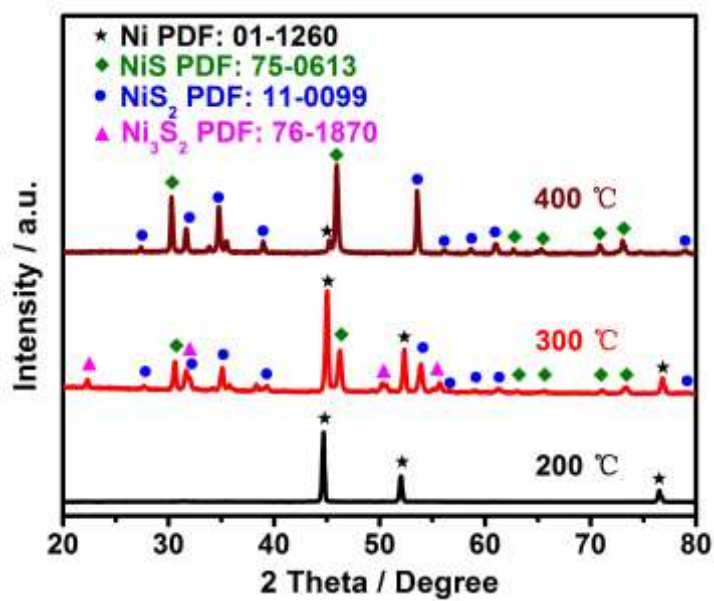

**Fig. S8** XRD diffraction pattern of the as-prepared m-NiS<sub>x</sub>-0.5/NF electrodes at different temperature.

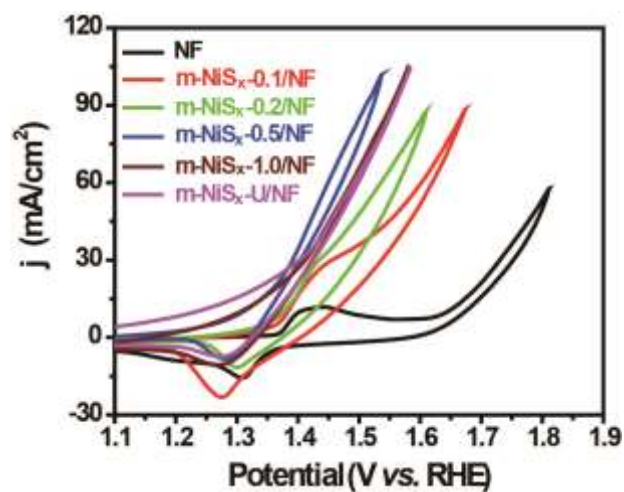

**Fig. S9** Cyclic voltammograms of the fresh m-NiS<sub>x</sub>/NF electrodes in 1.0 M KOH at a scan rate of 5 mV/s.

**Table S3** Comparison of OER performance of m-NiS<sub>x</sub>-0.5/NF electrode with various well-developed electrocatalysts in 1.0 M KOH

| Samples                            | Overpotential@<br>10 mA cm <sup>-2</sup> (mV) | Substrate   | Reference                            |
|------------------------------------|-----------------------------------------------|-------------|--------------------------------------|
| m-NiS <sub>x</sub> /NF             | 116                                           | Ni foam     | <b>This work</b>                     |
| h-NiS <sub>x</sub>                 | 180                                           | Ni foam     | Adv. Energy Mater. 2016, 6, 1502333  |
| Ni <sub>3</sub> S <sub>2</sub> NSs | 260                                           | Ni foam     | J. Am. Chem. Soc.2015, 137, 14023    |
| Fe-Ni <sub>3</sub> S <sub>2</sub>  | 282                                           | Ni foil     | Small 2017, 1604161                  |
| NiFe                               | 215                                           | Ni foam     | Nat. Commun.2015, 6, 6616            |
| CoNi <sub>2</sub> Se <sub>4</sub>  | 160                                           | CF paper    | Chem. Commun. 2017, 53, 5412         |
| NiCoP                              | 280                                           | Ni foam     | Nano Lett. 2016, 16, 7718            |
| NiSe                               | 270                                           | Ni foam     | Angew. Chem. Int. Ed. 2015, 54, 9351 |
| Cu@CoS <sub>x</sub>                | 160                                           | Copper foam | Adv. Mater. 2017, 29, 1606200        |
| MoO <sub>2</sub>                   | 260                                           | Ni foam     | Adv. Mater. 2016, 28, 3785           |
| NiFe LDH                           | 240                                           | Ni foam     | Science 2014, 345, 1593              |
| NiFe HNSs                          | 220                                           | GCE         | J. Mater. Chem. A. 2017, 5, 7769     |
| FeCoW                              | 223                                           | GCE         | Science 2016, 352, 333               |
| Ni <sub>2</sub> P                  | 290                                           | GCE         | Energy. Environ. Sci. 2015, 8, 2347  |

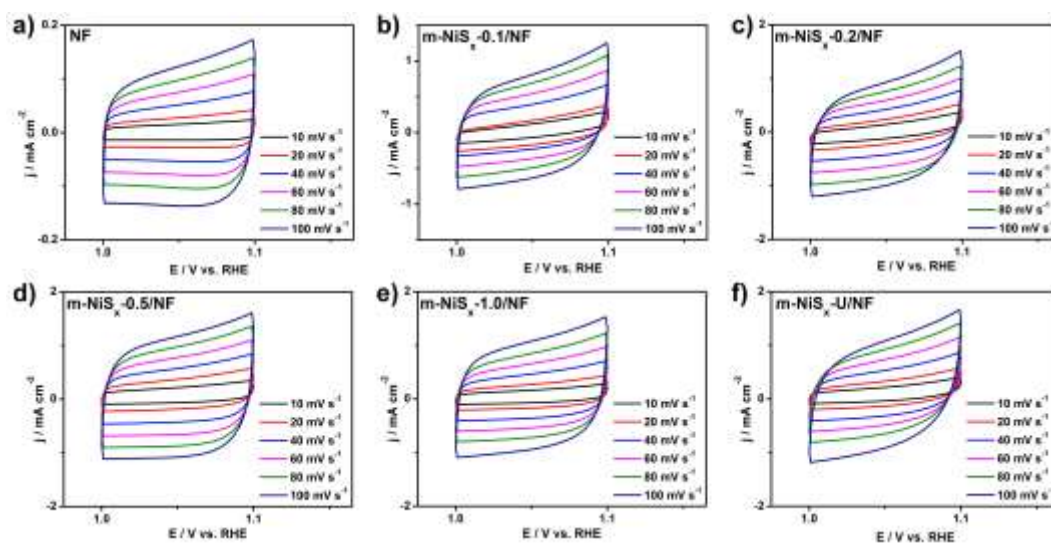

**Fig. S10** Electrochemical double-layer capacitances of the NF (a), m-NiS<sub>x</sub>-0.1/NF (b), m-NiS<sub>x</sub>-0.2/NF (c), m-NiS<sub>x</sub>-0.5/NF (d), m-NiS<sub>x</sub>-1.0/NF (e), and m-NiS<sub>x</sub>-U/NF (f) electrodes electrocatalysis for OER, respectively.

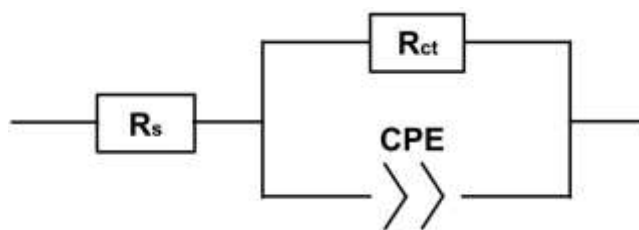

**Fig. S11** Equivalent circuit diagram of the electrochemical double-layer capacitance measurements.

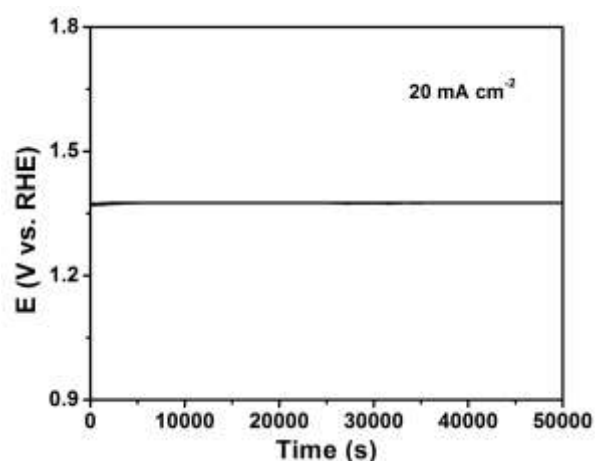

**Fig. S12** Chronopotentiometric curve of the m-NiS<sub>x</sub>-0.5/NF electrode electrocatalysis for OER at  $j = 20 \text{ mA cm}^{-2}$ .

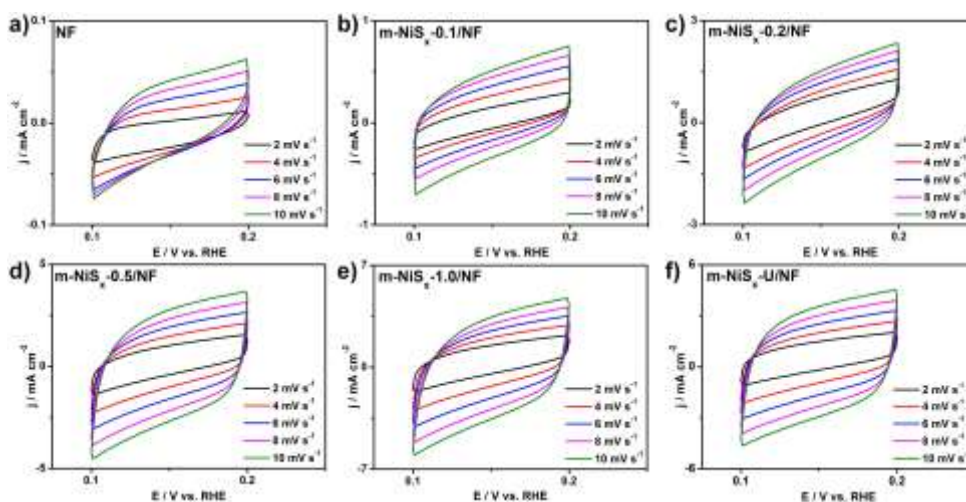

**Fig. S13** Electrochemical double-layer capacitances of the NF (a), m-NiS<sub>x</sub>-0.1/NF (b), m-NiS<sub>x</sub>-0.2/NF (c), m-NiS<sub>x</sub>-0.5/NF (d), m-NiS<sub>x</sub>-1.0/NF (e), and m-NiS<sub>x</sub>-U/NF (f) electrodes electrocatalysis for HER, respectively.



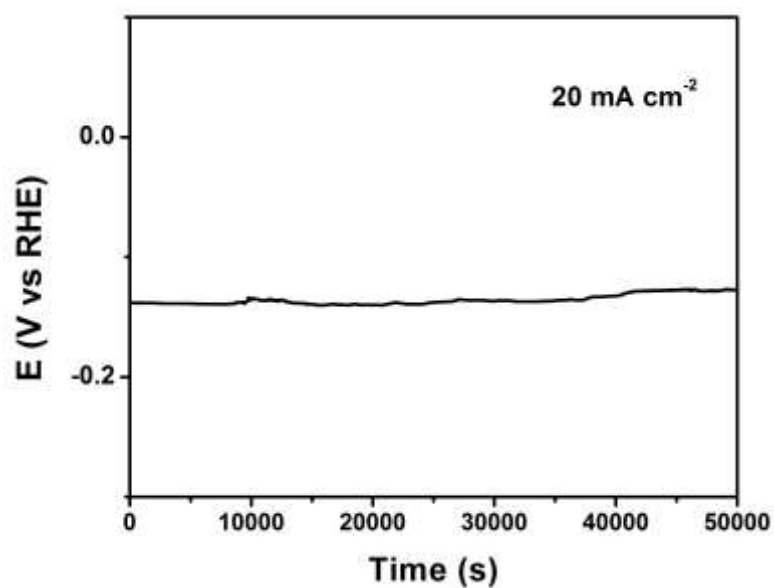

**Fig. S14** Chronopotentiometric curve of the m-NiS<sub>x</sub>-0.5/NF electrode electrocatalysis for HER at  $j = 20 \text{ mA cm}^{-2}$ .

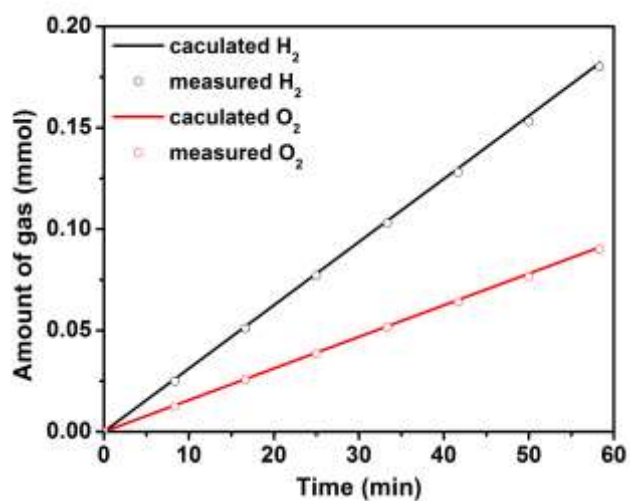

**Fig. S15** Amount of gas theoretically calculated and experimentally measured versus time for m-NiS<sub>x</sub>-0.5/NF in 1.0 M KOH.

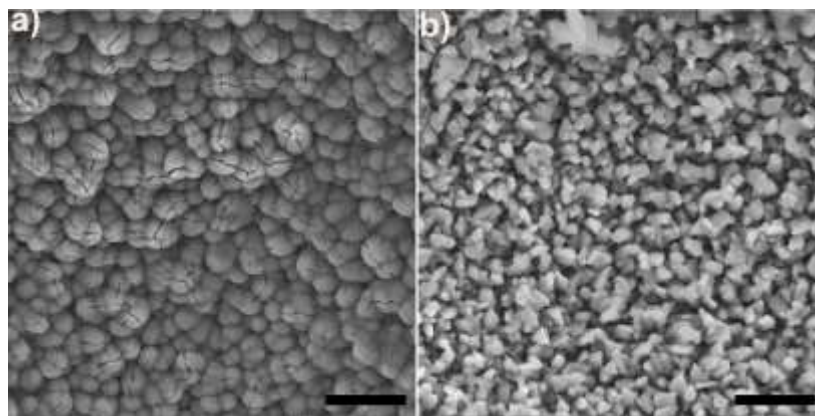

**Fig. S16** The morphologies of m-NiS<sub>x</sub>-0.5/NF after long-term HER (a) and OER (b) tests. Each scale bar is 10  $\mu$ m.

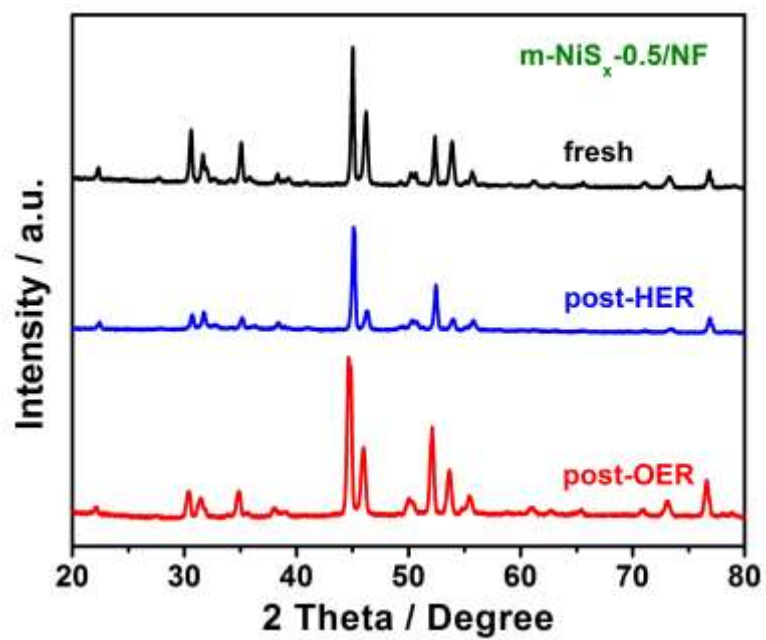

**Fig. S17** XRD patterns of fresh, post-HER, and post-OER m-NiS<sub>x</sub>-0.5/NF samples.

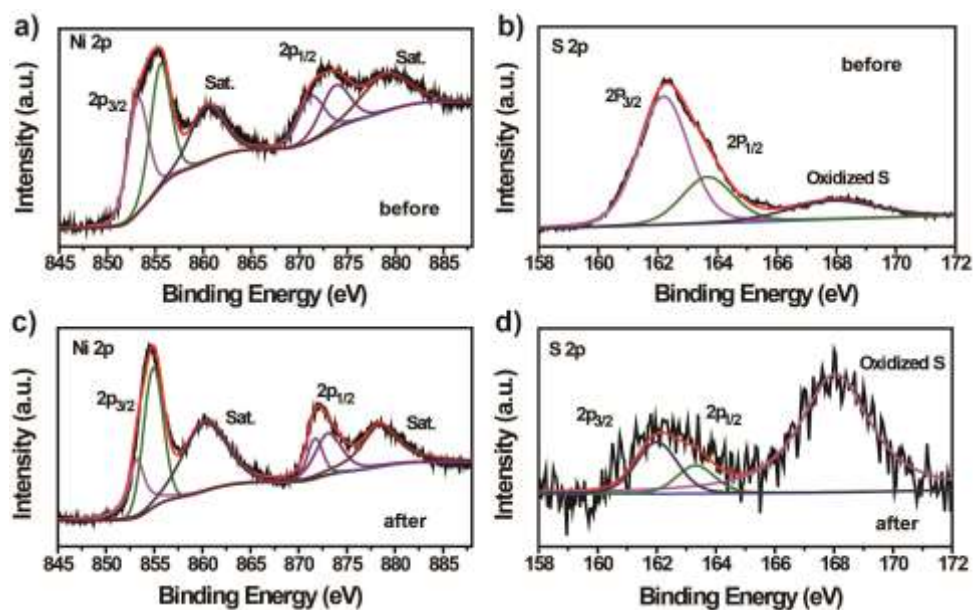

**Fig. S18** XPS spectra of m-NiS<sub>x</sub>-0.5/NF (cathode) before and after water splitting.

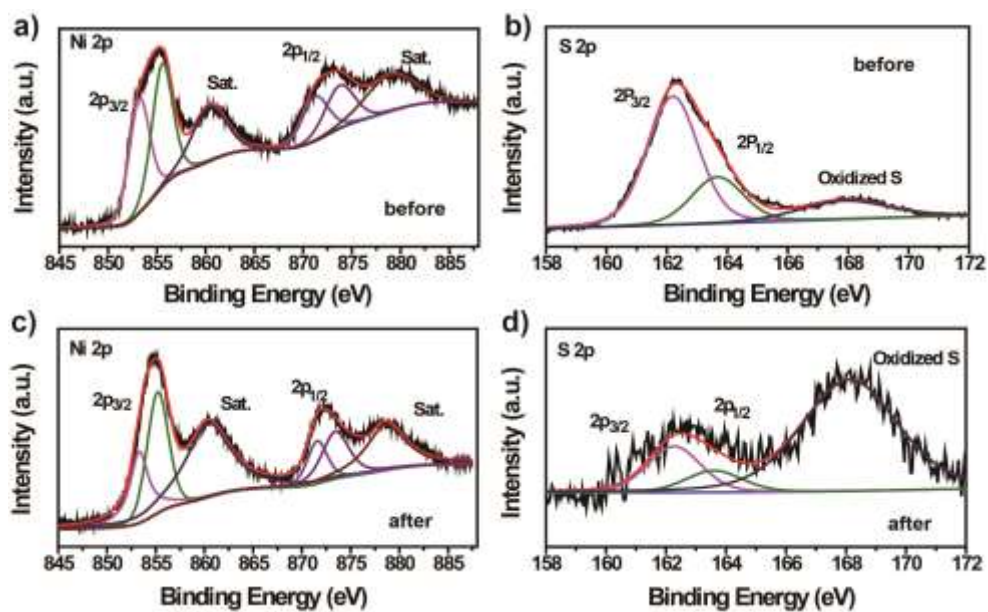

**Fig. S19** XPS spectra of m-NiS<sub>x</sub>-0.5/NF (anode) before and after water splitting.

**Table S4** Comparison of water-splitting performance of as-obtained m-NiS<sub>x</sub>-0.5/NF couple to recently well-developed electrocatalysts in 1.0 M KOH

| Samples                                          | water splitting cell voltage @ j (mA cm <sup>-2</sup> ) |        | Substrate   | Reference                            |
|--------------------------------------------------|---------------------------------------------------------|--------|-------------|--------------------------------------|
| m-NiS <sub>x</sub>                               | 10                                                      | 1.46 V | Ni foam     | <b>This work</b>                     |
| N-S <sub>3</sub> Ni <sub>2</sub>                 | 10                                                      | 1.48 V | Ni foam     | Adv. Mater. 2017, 1701584            |
| h-NiS <sub>x</sub>                               | 20                                                      | 1.53 V | Ni foam     | Adv. Energy Mater. 2016, 6, 1502333  |
| NiS                                              | 10                                                      | 1.64 V | Ni foam     | Chem. Commun. 2016, 52, 1486         |
| Ni <sub>3</sub> S <sub>2</sub> NSs               | 10                                                      | 1.76 V | Ni foam     | J. Am. Chem. Soc. 2015, 137, 14023   |
| Cu@CoS <sub>x</sub>                              | 10                                                      | 1.50 V | Copper foam | Adv. Mater. 2017, 29, 1606200        |
| NiFe LDH                                         | 10                                                      | 1.70 V | Ni foam     | Science 2014, 345, 1593              |
| NiFe HNSs                                        | 10                                                      | 1.68 V | GCD         | J. Mater. Chem. A. 2017, 5, 7769     |
| NiFe LDH                                         | 10                                                      | 1.54 V | Copper foam | Energy. Environ. Sci. 2017, 10, 1820 |
| FeB <sub>2</sub>                                 | 10                                                      | 1.57 V | Ni foam     | Adv. Energy Mater. 2017, 7, 1700513  |
| Co <sub>3</sub> Se <sub>4</sub>                  | 20                                                      | 1.63 V | Cobalt foam | Adv. Energy Mater. 2017, 7, 1602579  |
| CoO <sub>x</sub> @CN                             | ~20                                                     | 1.55 V | GCE         | J. Am. Chem. Soc. 2015, 137, 2688    |
| MoS <sub>2</sub> /Ni <sub>3</sub> S <sub>2</sub> | 10                                                      | 1.56 V | Ni foam     | Angew. Chem. Int. Ed. 2016, 55, 6702 |
| MoS <sub>2</sub> -Ni <sub>3</sub> S <sub>2</sub> | 10                                                      | 1.50 V | Ni foam     | ACS. Catal. <b>2017</b> , 7, 2357    |
